# Supplementary material for: The Impact of Travelling On The COVID–19 Infection Cases in Germany
Source: Research Square preprint supplement (doi:10.21203/rs.3.rs-538681/v2), 2021-07-06
Supplement: Supplementary file 1 [file 10a8eea95bc177b8e11b0005.pdf]

## Appendix – Plots

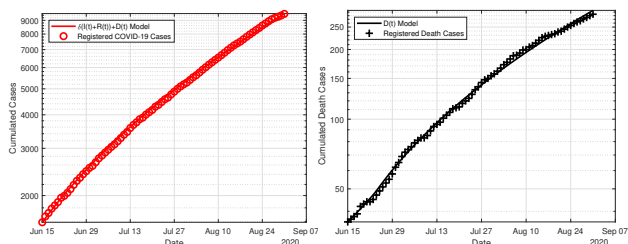

**Figure 1.** Graphs of infections and death cases in Albania according to Johns Hopkins University from 26 January to 31 August as well as the respective estimations.

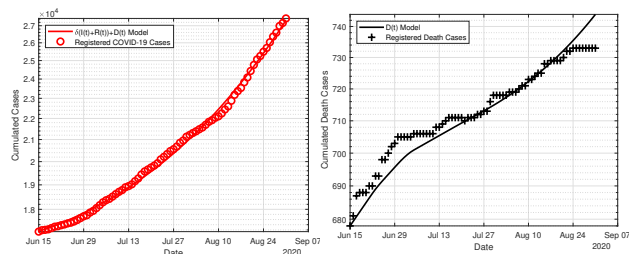

**Figure 2.** Graphs of infections and death cases in Austria according to Johns Hopkins University from 26 January to 31 August as well as the respective estimations.

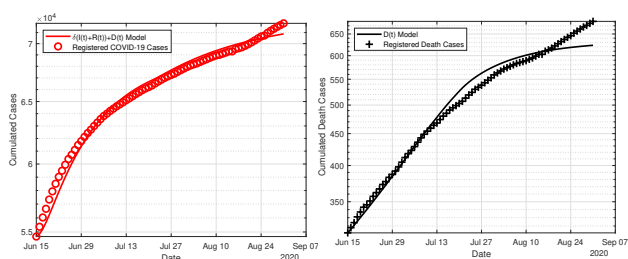

**Figure 3.** Graphs of infections and death cases in Belarus according to Johns Hopkins University from 26 January to 31 August as well as the respective estimations.

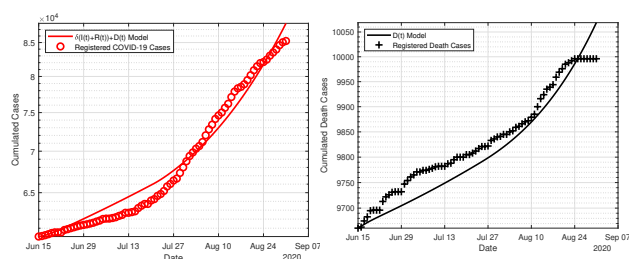

**Figure 4.** Graphs of infections and death cases in Belgium according to Johns Hopkins University from 26 January to 31 August as well as the respective estimations.

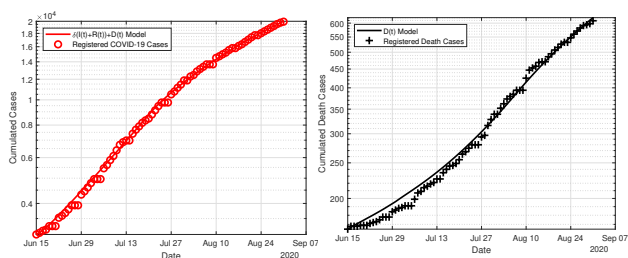

**Figure 5.** Graphs of infections and death cases in Bosnia and Herzegovina according to Johns Hopkins University from 26 January to 31 August as well as the respective estimations.

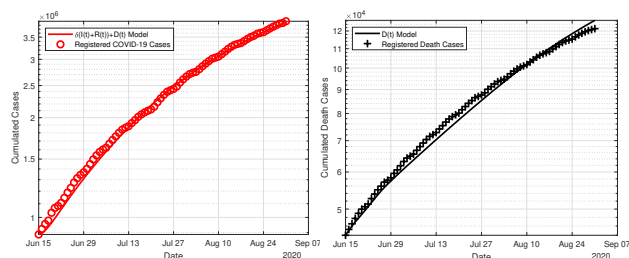

**Figure 6.** Graphs of infections and death cases in Brazil according to Johns Hopkins University from 26 January to 31 August as well as the respective estimations.

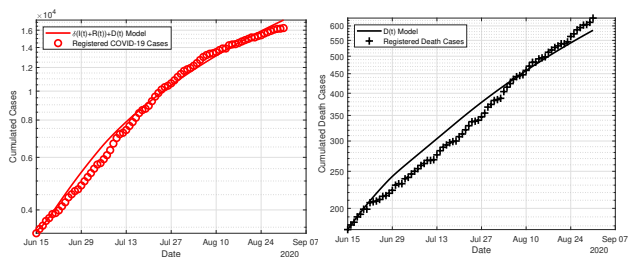

**Figure 7.** Graphs of infections and death cases in Bulgaria according to Johns Hopkins University from 26 January to 31 August as well as the respective estimations.

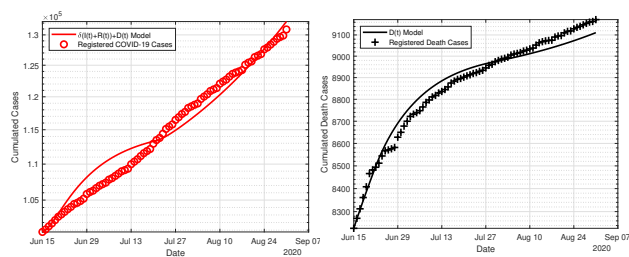

**Figure 8.** Graphs of infections and death cases in Canada according to Johns Hopkins University from 26 January to 31 August as well as the respective estimations.

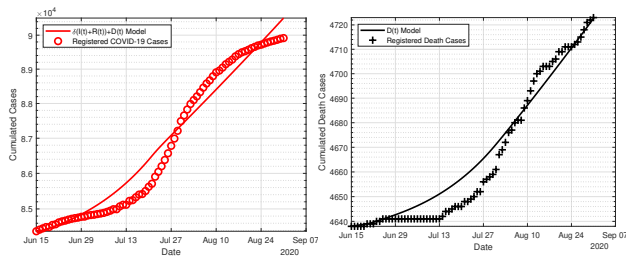

**Figure 9.** Graphs of infections and death cases in China according to Johns Hopkins University from 26 January to 31 August as well as the respective estimations.

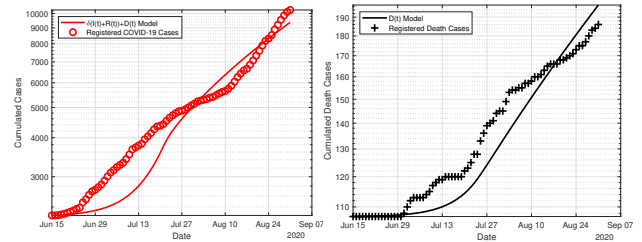

**Figure 10.** Graphs of infections and death cases in Croatia according to Johns Hopkins University from 26 January to 31 August as well as the respective estimations.

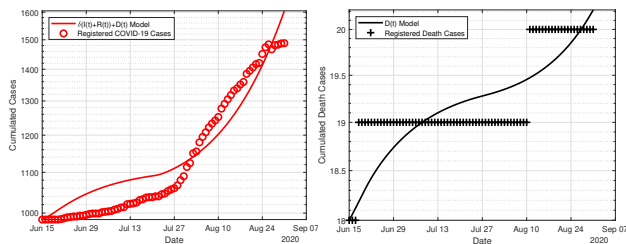

**Figure 11.** Graphs of infections and death cases in Cyprus according to Johns Hopkins University from 26 January to 31 August as well as the respective estimations.

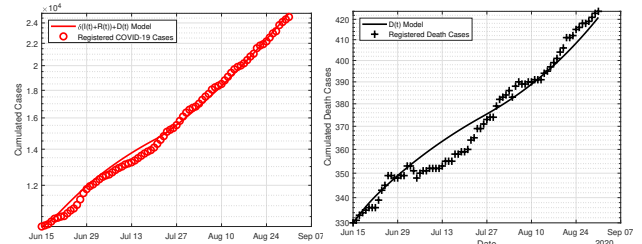

**Figure 12.** Graphs of infections and death cases in the Czech Republic according to Johns Hopkins University from 26 January to 31 August as well as the respective estimations.

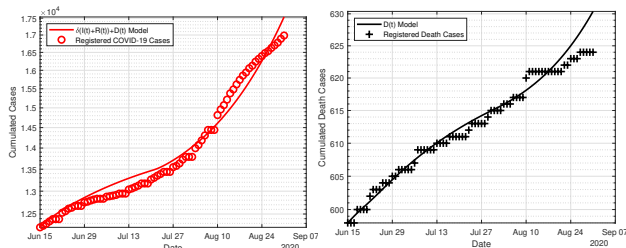

**Figure 13.** Graphs of infections and death cases in Denmark according to Johns Hopkins University from 26 January to 31 August as well as the respective estimations.

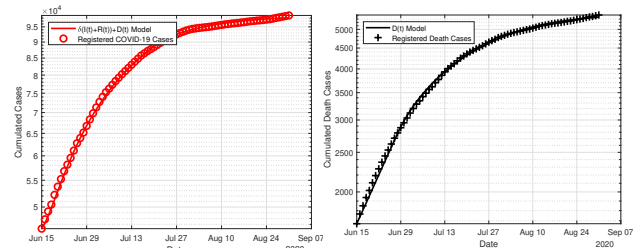

**Figure 14.** Graphs of infections and death cases in Egypt according to Johns Hopkins University from 26 January to 31 August as well as the respective estimations.

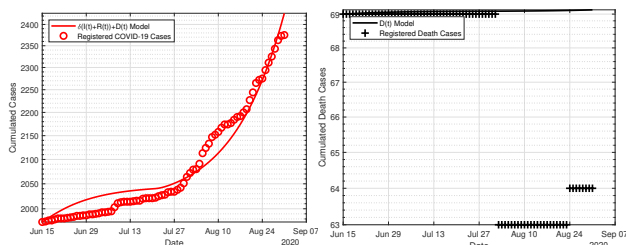

**Figure 15.** Graphs of infections and death cases in Estonia according to Johns Hopkins University from 26 January to 31 August as well as the respective estimations.

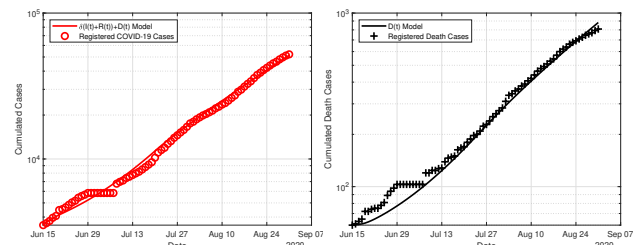

**Figure 16.** Graphs of infections and death cases in Ethiopia according to Johns Hopkins University from 26 January to 31 August as well as the respective estimations.

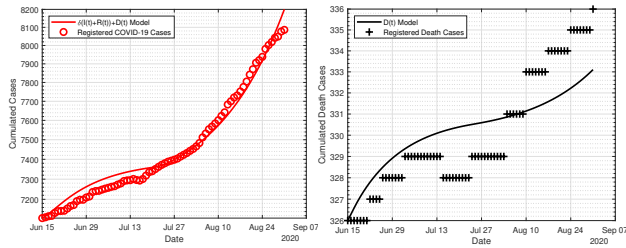

**Figure 17.** Graphs of infections and death cases in Finland according to Johns Hopkins University from 26 January to 31 August as well as the respective estimations.

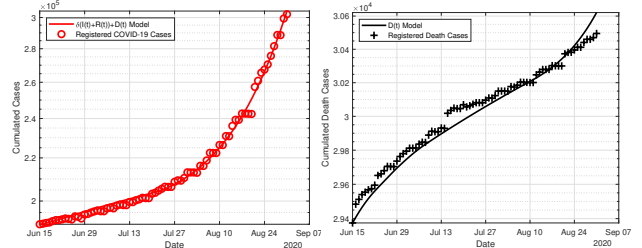

**Figure 18.** Graphs of infections and death cases in France according to Johns Hopkins University from 26 January to 31 August as well as the respective estimations.

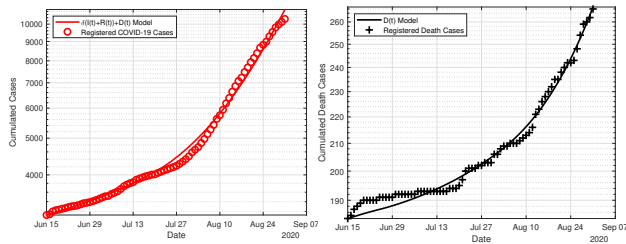

**Figure 19.** Graphs of infections and death cases in Greece according to Johns Hopkins University from 26 January to 31 August as well as the respective estimations.

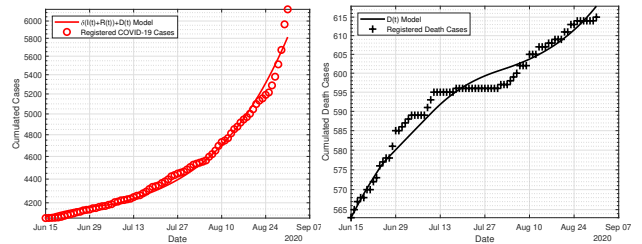

**Figure 20.** Graphs of infections and death cases in Hungary according to Johns Hopkins University from 26 January to 31 August as well as the respective estimations.

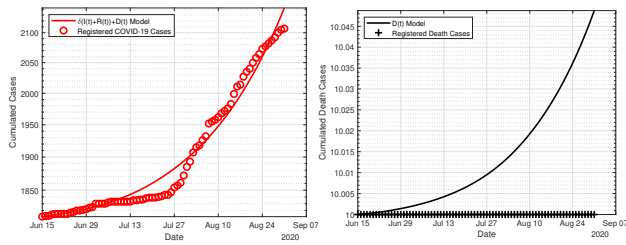

**Figure 21.** Graphs of infections and death cases in Iceland according to Johns Hopkins University from 26 January to 31 August as well as the respective estimations.

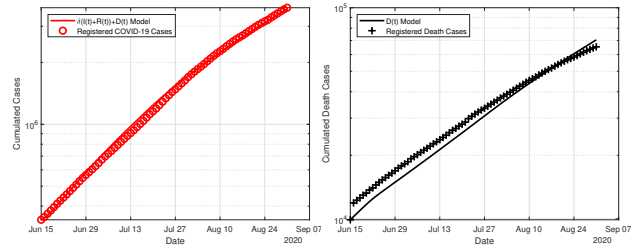

**Figure 22.** Graphs of infections and death cases in India according to Johns Hopkins University from 26 January to 31 August as well as the respective estimations.

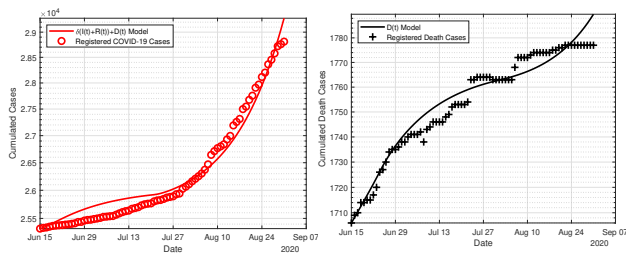

**Figure 23.** Graphs of infections and death cases in Ireland according to Johns Hopkins University from 26 January to 31 August as well as the respective estimations.

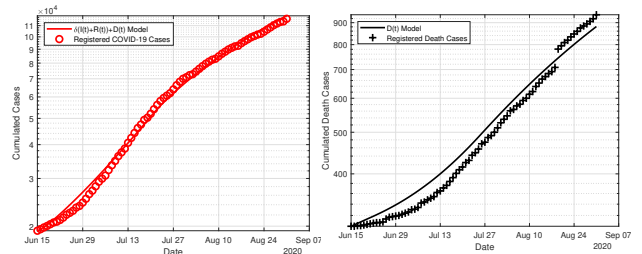

**Figure 24.** Graphs of infections and death cases in Israel according to Johns Hopkins University from 26 January to 31 August as well as the respective estimations.

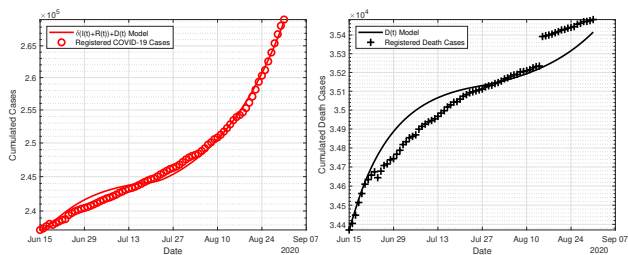

**Figure 25.** Graphs of infections and death cases in Italy according to Johns Hopkins University from 26 January to 31 August as well as the respective estimations.

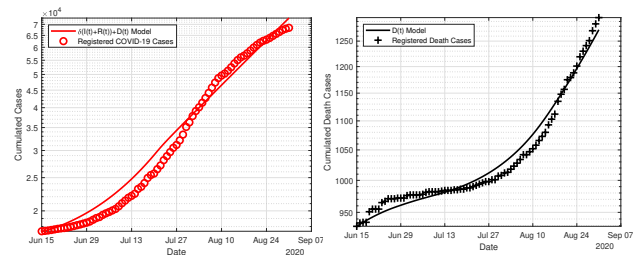

**Figure 26.** Graphs of infections and death cases in Japan according to Johns Hopkins University from 26 January to 31 August as well as the respective estimations.

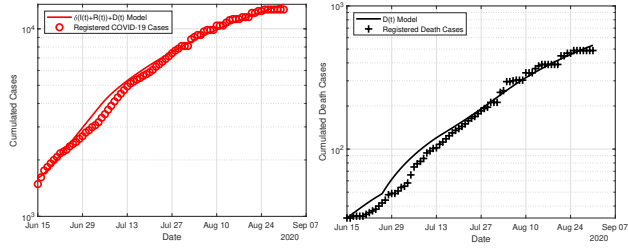

**Figure 27.** Graphs of infections and death cases in Kosovo according to Johns Hopkins University from 26 January to 31 August as well as the respective estimations.

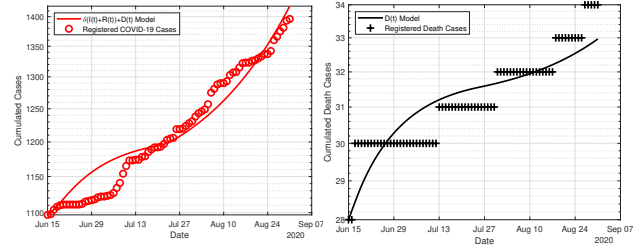

**Figure 28.** Graphs of infections and death cases in Latvia according to Johns Hopkins University from 26 January to 31 August as well as the respective estimations.

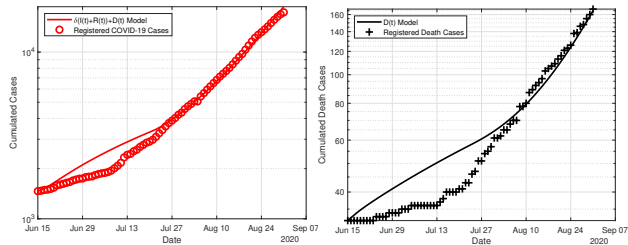

**Figure 29.** Graphs of infections and death cases in Lebanon according to Johns Hopkins University from 26 January to 31 August as well as the respective estimations.

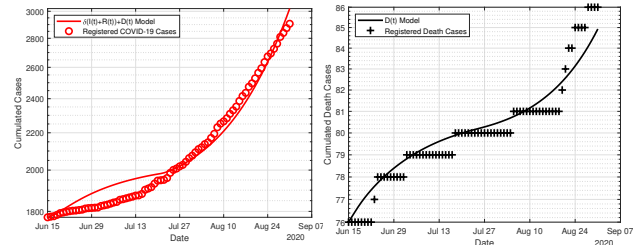

**Figure 30.** Graphs of infections and death cases in Lithuania according to Johns Hopkins University from 26 January to 31 August as well as the respective estimations.

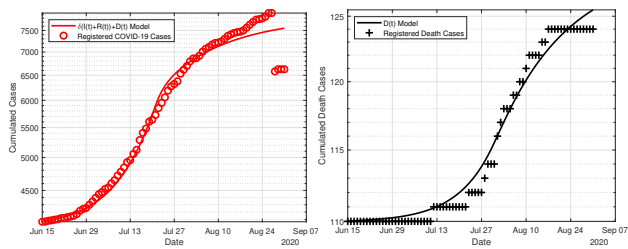

**Figure 31.** Graphs of infections and death cases in Luxembourg according to Johns Hopkins University from 26 January to 31 August as well as the respective estimations.

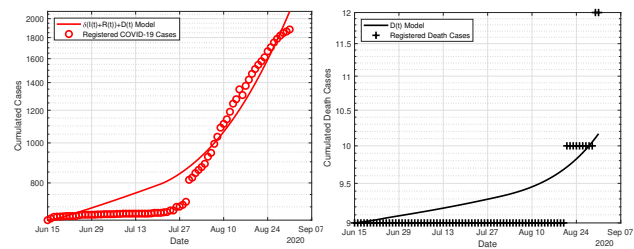

**Figure 32.** Graphs of infections and death cases in Malta according to Johns Hopkins University from 26 January to 31 August as well as the respective estimations.

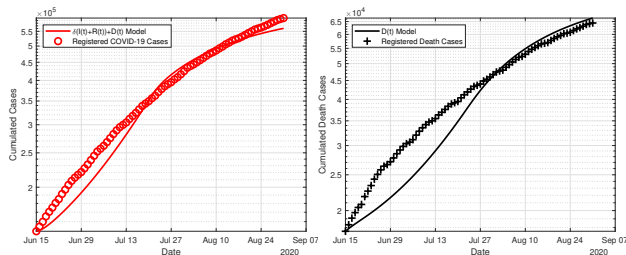

**Figure 33.** Graphs of infections and death cases in Mexico according to Johns Hopkins University from 26 January to 31 August as well as the respective estimations.

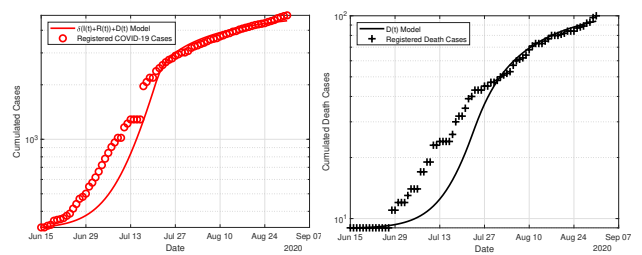

**Figure 34.** Graphs of infections and death cases in Montenegro according to Johns Hopkins University from 26 January to 31 August as well as the respective estimations.

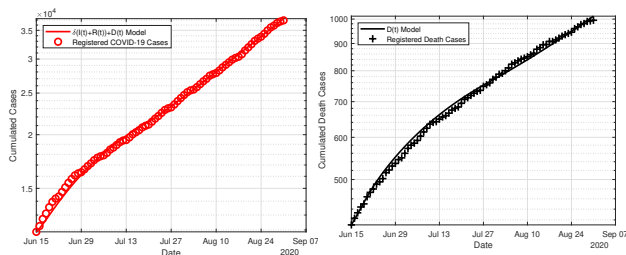

**Figure 35.** Graphs of infections and death cases in Moldova according to Johns Hopkins University from 26 January to 31 August as well as the respective estimations.

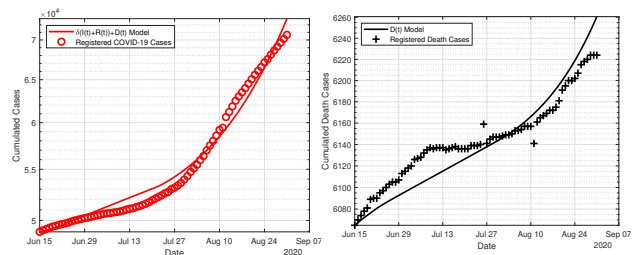

**Figure 36.** Graphs of infections and death cases in the Netherlands according to Johns Hopkins University from 26 January to 31 August as well as the respective estimations.

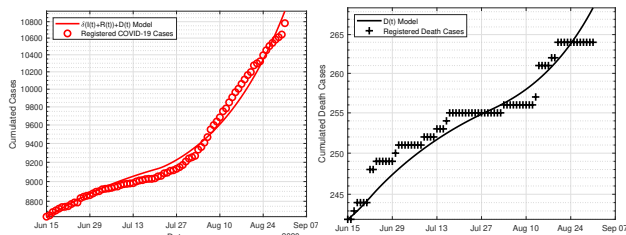

**Figure 37.** Graphs of infections and death cases in Norway according to Johns Hopkins University from Jan 26 January to 31 August as well as the respective estimations.

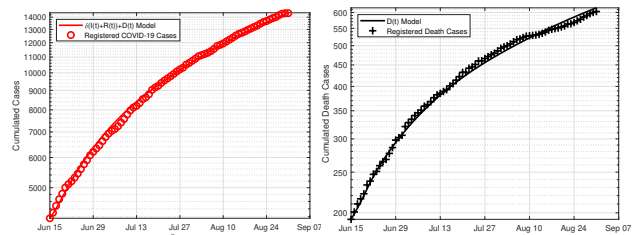

**Figure 38.** Graphs of infections and death cases in Northern Macedonia according to Johns Hopkins University from 26 January to 31 August as well as the respective estimations.

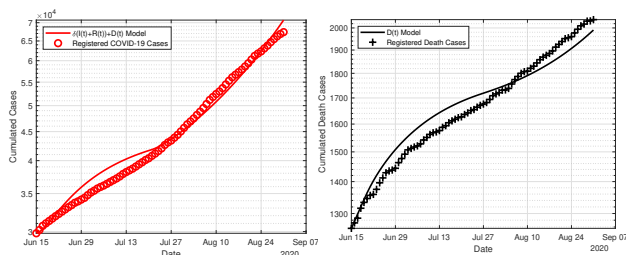

**Figure 39.** Graphs of infections and death cases in Poland according to Johns Hopkins University from 26 January to 31 August as well as the respective estimations.

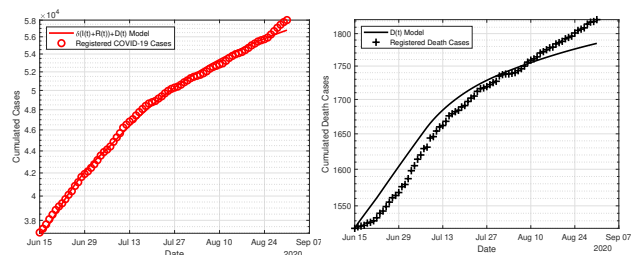

**Figure 40.** Graphs of infections and death cases in Portugal according to Johns Hopkins University from 26 January to 31 August as well as the respective estimations.



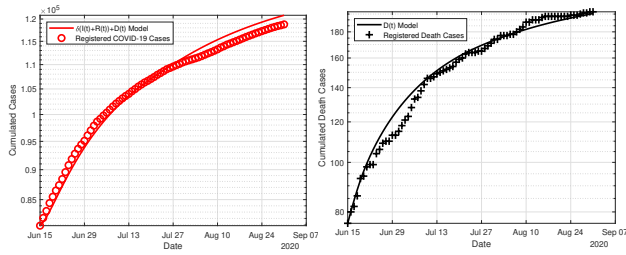

**Figure 41.** Graphs of infections and death cases in Qatar according to Johns Hopkins University from 26 January to 31 August as well as the respective estimations.

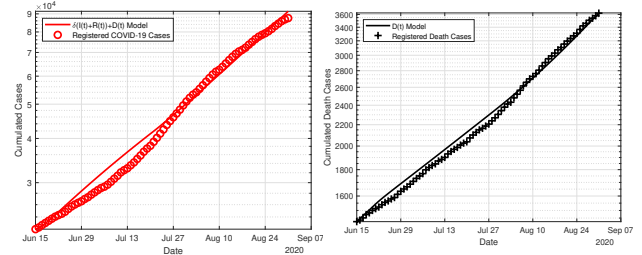

**Figure 42.** Graphs of infections and death cases in Romania according to Johns Hopkins University from 26 January to 31 August as well as the respective estimations.

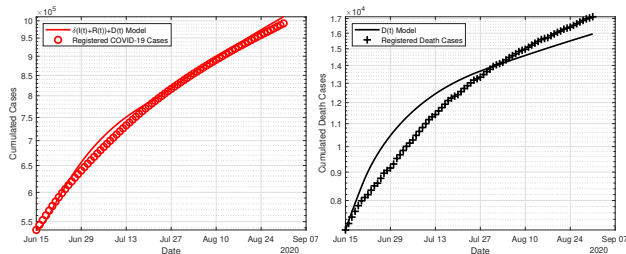

**Figure 43.** Graphs of infections and death cases in Russia according to Johns Hopkins University from 26 January to 31 August as well as the respective estimations.

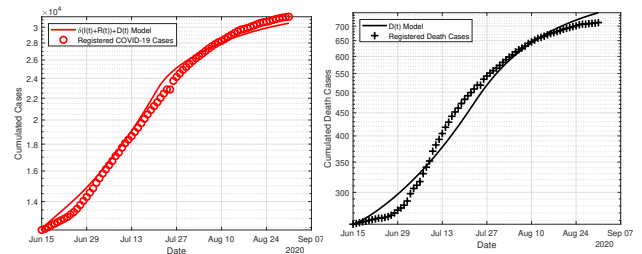

**Figure 44.** Graphs of infections and death cases in Serbia according to Johns Hopkins University from 26 January to 31 August as well as the respective estimations.

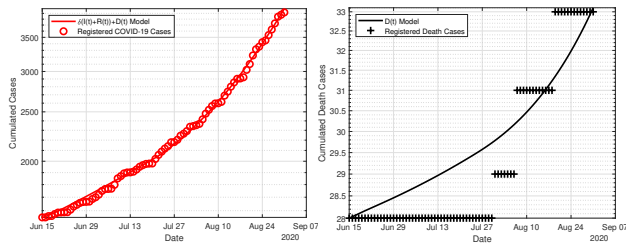

**Figure 45.** Graphs of infections and death cases in Slovakia according to Johns Hopkins University from 26 January to 31 August as well as the respective estimations.

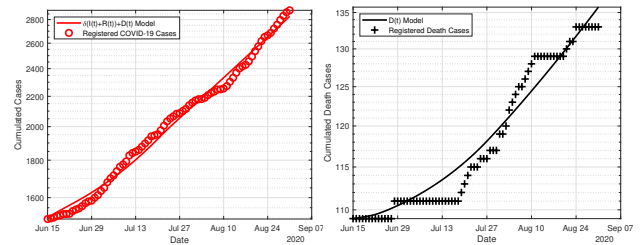

**Figure 46.** Graphs of infections and death cases in Slovenia according to Johns Hopkins University from 26 January to 31 August as well as the respective estimations.

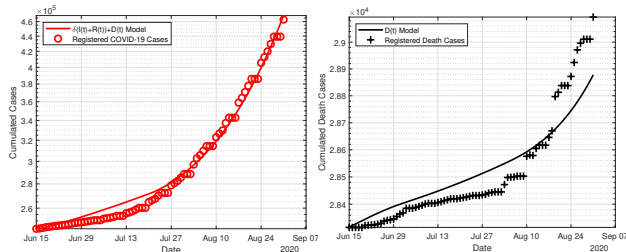

**Figure 47.** Graphs of infections and death cases in Spain according to Johns Hopkins University from 26 January to 31 August as well as the respective estimations.

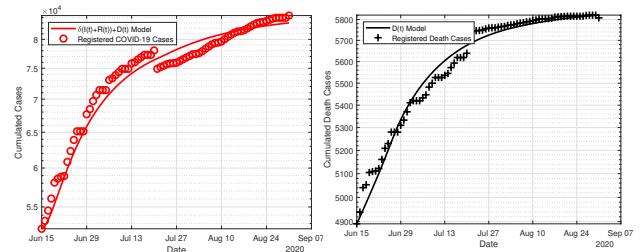

**Figure 48.** Graphs of infections and death cases in Sweden according to Johns Hopkins University from 26 January to 31 August as well as the respective estimations.

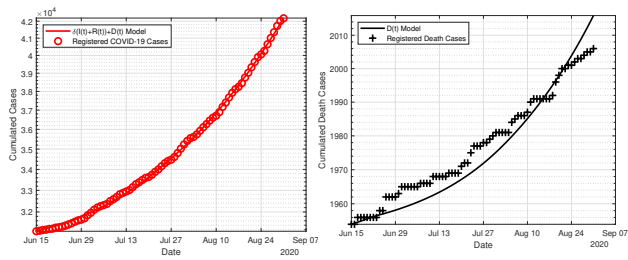

**Figure 49.** Graphs of infections and death cases in Switzerland according to Johns Hopkins University from 26 January to 31 August as well as the respective estimations.

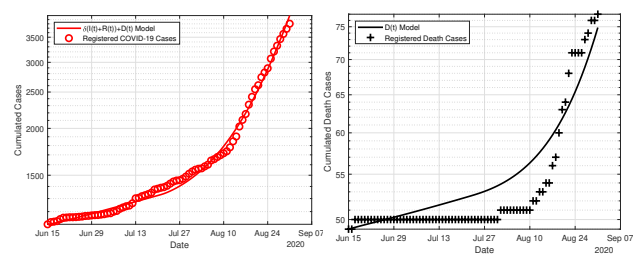

**Figure 50.** Graphs of infections and death cases in Tunisia according to Johns Hopkins University from 26 January to 31 August as well as the respective estimations.

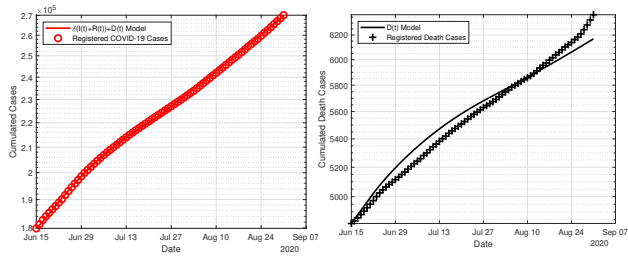

**Figure 51.** Graphs of infections and death cases in Turkey according to Johns Hopkins University from 26 January to 31 August as well as the respective estimations.

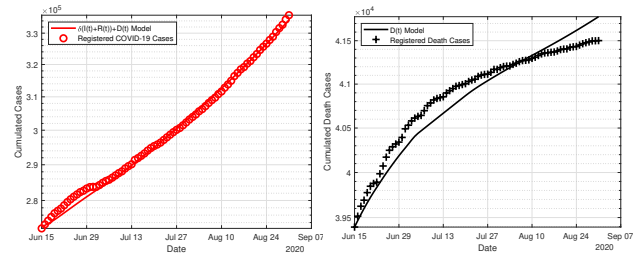

**Figure 52.** Graphs of infections and death cases in the UK according to Johns Hopkins University from 26 January to 31 August as well as the respective estimations.

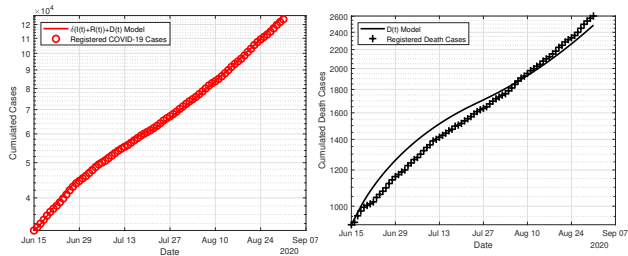

**Figure 53.** Graphs of infections and death cases in the Ukraine according to Johns Hopkins University from 26 January to 31 August as well as the respective estimations.

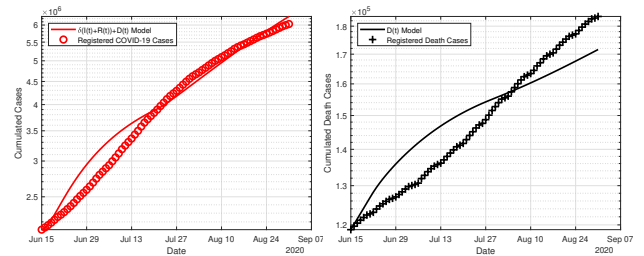

**Figure 54.** Graphs of infections and death cases in the USA according to Johns Hopkins University from 26 January to 31 August as well as the respective estimations.

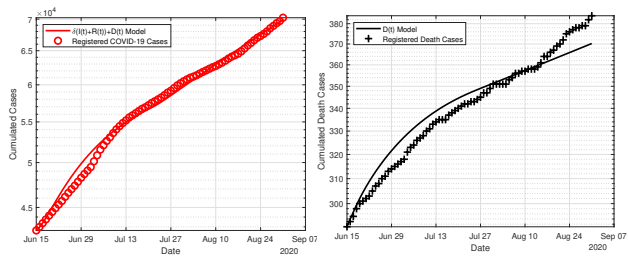

**Figure 55.** Graphs of infections and death cases in the UAE according to Johns Hopkins University from 26 January to 31 August as well as the respective estimations.
